# Supplementary material for: Exosome-like vesicles in uterine aspirates: a comparison of ultracentrifugation-based isolation protocols
Source: PubMed Central journal article supplement (PMC4912787; doi:10.1186/s12967-016-0935-4), 2016-06-18

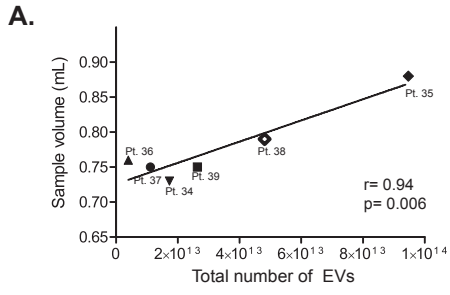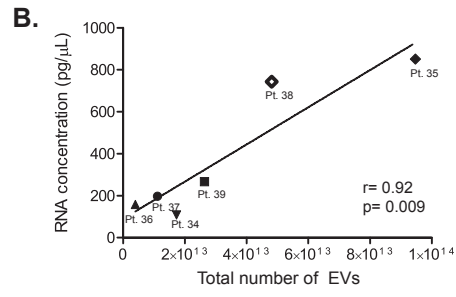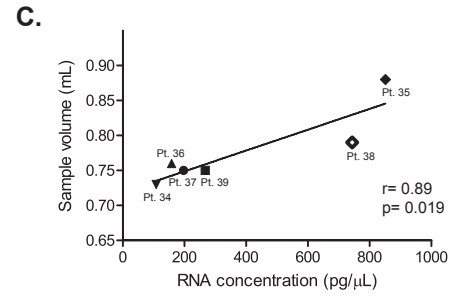

Supplement: 12967_2016_935_MOESM6_ESM.pdf [file 12967_2016_935_MOESM6_ESM.pdf]
